# Supplementary material for: Adaptation prevents the extinction of Chlamydomonas reinhardtii under toxic beryllium
Source: PeerJ. 2016 Mar 21;4:e1823. doi: 10.7717/peerj.1823 (PMC4806628; doi:10.7717/peerj.1823)
Supplement: Supplemental Information 3 [file peerj-04-1823-s006.xlsx]

## Sheet: Hoja3
					nº cels/mL	Cultures containing								nº cels/mL	Cultures containing
	Mean	Variance		Tube	Set 2	0 resistant cells	From 1 to 5×104 total resistant cells	From 5×104 to 10×104 total resistant cells	From 10×104 to 25×104 total resistant cells	From 25×104 to 50×104 total resistant cells	From 50×104 to 1×106 total resistant cells	More than 1×106	Non estimable	Set 1	0 resistant cells	From 1 to 5×104 total resistant cells	From 5×104 to 10×104 total resistant cells	From 10×104 to 25×104 total resistant cells	From 25×104 to 50×104 total resistant cells	From 50×104 to 1×106 total resistant cells	More than 1×106	Non estimable
Set2	57468.1	4.48208e+09		1	1000		X							0	X
Set1	365989	2.65956e+11		2	1000		X							0	X
				3	2000		X							0	X
				4	2000		X							0	X
				5	2000		X							0	X
				6	3000		X							0	X
				7	3000		X							n/s								X
				8	5000		X							n/s								X
				9	5000		X							n/s								X
				10	5000		X							n/s								X
				11	5000		X							n/s								X
				12	5000		X							n/s								X
				13	6000		X							n/s								X
				14	6000		X							n/s								X
				15	7000		X							3000		X
				16	7000		X							8000		X
				17	8000		X							9000		X
				18	8000		X							11000		X
				19	10000		X							18000		X
				20	11000		X							21000		X
				21	11000		X							21000		X
				22	11000		X							29000		X
				23	12000		X							32000		X
				24	14000		X							37000		X
				25	36000		X							37000		X
				26	37000		X							41000		X
				27	53000			X						49000		X
				28	56000			X						49000		X
				29	64000			X						51000			X
				30	65000			X						56000			X
				31	73000			X						72000			X
				32	77000			X						73000			X
				33	79000			X						75000			X
				34	85000			X						78000			X
				35	91000			X						81000			X
				36	97000			X						82000			X
				37	100000			X						83000			X
				38	101000				X					95000			X
				39	114000				X					101000				X
				40	134000				X					101000				X
				41	141000				X					103000				X
				42	142000				X					117000				X
				43	160000				X					122000				X
				44	170000				X					127000				X
				45	186000				X					131000				X
				46	230000				X					134000				X
				47	260000					X				146000				X
				48										163000				X
				49										189000				X
				50										190000				X
				51										193000				X
				52										204000				X
				53										214000				X
				54										220000				X
				55										227000				X
				56										229000				X
				57										231000				X
				58										238000				X
				59										244000				X
				60										250000				X
				61										251000					X
				62										256000					X
				63										271000					X
				64										279000					X
				65										293000					X
				66										301000					X
				67										312000					X
				68										321000					X
				69										324000					X
				70										331000					X
				71										357000					X
				72										360000					X
				73										374000					X
				74										381000					X
				75										416000					X
				76										425000					X
				77										487000					X
				78										600000						X
				79										612000						X
				80										675000						X
				81										690000						X
				82										731000						X
				83										740000						X
				84										873000						X
				85										880000						X
				86										971000						X
				87										974000						X
				88										1090000							X
				89										1213000							X
				90										1341000							X
				91										1457000							X
				92										1460000							X
				93										1720000							X
				94										1870000							X
				95										3220000							X
			Σ tubes between same range			0	26	11	9	1	0	0	0		6	14	10	22	17	10	8	8
